# Supplementary material for: Cryogenic magneto-caloric effect and magneto-structural correlations in carboxylate-bridged Gd(iii) compounds
Source: Royal Society of Chemistry journal article supplement (doi:10.1039/c4dt00697f), 2014-05-19
Supplement: c4dt00697f1.pdf [file c4dt00697f1.pdf]

# Supporting Information

to the paper entitled

## Cryogenic magneto-caloric effect and magneto-structural correlations in carboxylate-bridged Gd(III) compounds

O. Roubeau, G. Lorusso, S. J. Teat and M. Evangelisti

### Table of Contents

|                                                                                                                                               |        |
|-----------------------------------------------------------------------------------------------------------------------------------------------|--------|
| Table S1. Relevant magneto-structural parameters of Gd(III) compounds                                                                         | p. S2  |
| Figure S1. Labeled view of two successive Gd···Gd bridges along the coordination chains in the structure of <b>1</b>                          | p. S3  |
| Figure S2. Labeled view of the two successive slightly different Gd···Gd bridges along the coordination chains in the structure of <b>2</b> . | p. S4  |
| Figure S3. Field dependence of isothermal magnetization for <b>1</b> and <b>2</b> at 2 K                                                      | p. S5  |
| Figure S4. Temperature dependence of $\chi^{-1}$ for <b>1</b> and <b>2</b>                                                                    | p. S5  |
| Figure S5. Temperature dependence of $S_m$ for <b>1</b> and <b>2</b>                                                                          | p. S6  |
| Figure S6. Field dependence of isothermal magnetization for <b>1</b> and <b>2</b> at 2-10 K                                                   | p. S7  |
| Figure S7. Magnetic entropy changes for <b>1</b> and <b>2</b> normalized to $R$                                                               | p. S8  |
| Figure S8. Magneto-structural correlations for Gd(III) pairs with A- and B-type bridges.                                                      | p. S9  |
| References                                                                                                                                    | p. S10 |

Table S1. Magneto-structural parameters of Gd(III) compounds with only two  $\mu\text{O}:\kappa^2\text{OO}$  carboxylic bridges, so-called A-type bridge<sup>#</sup> and two  $\mu\text{O}:\kappa^2\text{OO}$  and two  $\mu\text{OO syn-syn}$  carboxylic bridges, so-called B-type bridge.

| Compound <sup>a</sup>                                                                                                              | Gd–O–Gd (°) | $d_{\text{Gd}\cdots\text{Gd}}$ (Å) | $d_{\text{Gd–O}}$ (Å) | Topology     | $J$ (cm <sup>-1</sup> ) <sup>b</sup> | Ref.      |
|------------------------------------------------------------------------------------------------------------------------------------|-------------|------------------------------------|-----------------------|--------------|--------------------------------------|-----------|
| <b>A-type</b>                                                                                                                      |             |                                    |                       |              |                                      |           |
| [Gd <sub>2</sub> (CH <sub>3</sub> CO <sub>2</sub> ) <sub>6</sub> (H <sub>2</sub> O) <sub>4</sub> ]·4H <sub>2</sub> O               | 115.48      | 4.206                              | 2.402/2.571           | dinuclear    | 0.060                                | 1         |
| [Gd <sub>2</sub> (CH <sub>3</sub> CO <sub>2</sub> ) <sub>6</sub> (H <sub>2</sub> O) <sub>4</sub> ]·4H <sub>2</sub> O               | 115.31      | 4.183                              | 2.393/2.558           | dinuclear    | 0.060                                | 2         |
| [NH <sub>3</sub> C <sub>2</sub> H <sub>5</sub> ][Gd(Cl <sub>2</sub> CHCO <sub>2</sub> ) <sub>4</sub> ] <sup>c</sup>                | 113.50      | 4.181                              | 2.443/2.556           | 1D alt.      | 0.058                                | 3         |
| [Gd <sub>2</sub> (mal) <sub>3</sub> (H <sub>2</sub> O) <sub>6</sub> ] <sup>d</sup>                                                 | 116.8       | 4.2763                             | 2.308/2.597           | 3D/dinuclear | 0.048                                | 4         |
| [NH <sub>3</sub> CH <sub>3</sub> ][Gd(Cl <sub>2</sub> CHCO <sub>2</sub> ) <sub>4</sub> ] <sup>c</sup>                              | 114.07      | 4.184                              | 2.449/2.538           | 1D alt.      | 0.046                                | 5         |
| {[Gd(cit)(H <sub>2</sub> O) <sub>2</sub> ]·H <sub>2</sub> O} <sub>∞</sub>                                                          | 118.49      | 4.321                              | 2.508/2.521           | 1D/dinuclear | 0.039                                | 6         |
| [Gd <sub>2</sub> (CH <sub>3</sub> CO <sub>2</sub> ) <sub>2</sub> (dbm) <sub>4</sub> (MeOH) <sub>2</sub> ]                          | 113.65      | 4.128                              | -                     | dinuclear    | 0.038                                | 7         |
| [Gd <sub>2</sub> (CH <sub>3</sub> CO <sub>2</sub> ) <sub>6</sub> (H <sub>2</sub> O) <sub>4</sub> ]·2H <sub>2</sub> O               | 115.47      | 4.1589                             | 2.378/2.539           | dinuclear    | 0.031                                | 8         |
| [Gd(Hnica)(H <sub>2</sub> O) <sub>2</sub> (SO <sub>4</sub> ) <sub>∞</sub> ] <sup>e</sup>                                           | 113.35*     | 4.2555*                            | 2.4505/2.6445*        | 1D alt.      | 0.030                                | 9         |
| {[Gd <sub>2</sub> (ox)(fum) <sub>2</sub> (H <sub>2</sub> O) <sub>4</sub> ]·4H <sub>2</sub> O} <sub>∞</sub>                         | 119.1       | 4.5816                             | -                     | 3D/1D        | 0.019                                | 8         |
| <b>2</b> {[Gd(butOH) <sub>3</sub> (H <sub>2</sub> O)]·H <sub>2</sub> O} <sub>∞</sub>                                               | 113.375*    | 4.1115*                            | 2.3925/2.5265*        | 3D/1D        | 0.0132                               | this work |
| [Gd <sub>2</sub> (tpac) <sub>6</sub> (H <sub>2</sub> O) <sub>4</sub> ]                                                             | 112.5       | 4.1255                             | 2.412/2.547           | dinuclear    | -0.014                               | 10        |
| [Gd <sub>2</sub> (pac) <sub>6</sub> (H <sub>2</sub> O) <sub>4</sub> ]                                                              | 113.16      | 4.1215                             | 2.394/2.543           | dinuclear    | -0.0309                              | 10        |
| <b>B-type</b>                                                                                                                      |             |                                    |                       |              |                                      |           |
| [Gd <sub>2</sub> (Hsal) <sub>6</sub> (H <sub>2</sub> O) <sub>8</sub> ] <sup>f</sup>                                                | -           | 4.25                               | -                     | dinuclear    | 0.050                                | 11        |
| [Gd <sub>2</sub> (Cl <sub>2</sub> CHCO <sub>2</sub> ) <sub>6</sub> (H <sub>2</sub> O) <sub>2</sub> (hypy) <sub>2</sub> ]           | 107.64      | 4.051                              | 2.378/2.638           | dinuclear    | -0.022                               | 12        |
| [Gd(CF <sub>2</sub> HCO <sub>2</sub> ) <sub>3</sub> (phen)]                                                                        | 106.92      | 4.034                              | 2.354/2.662           | dinuclear    | -0.032                               | 13        |
| [Gd <sub>2</sub> (ClCH <sub>2</sub> CO <sub>2</sub> ) <sub>6</sub> (bipy) <sub>2</sub> ]                                           | 106.585     | 3.99                               | 2.372/2.602           | dinuclear    | -0.040                               | 14        |
| [Gd <sub>2</sub> (CH <sub>3</sub> CO <sub>2</sub> ) <sub>6</sub> (phen) <sub>2</sub> ]                                             | 102.5       | 4.035                              | 2.441/2.726           | dinuclear    | -0.053                               | 15        |
| [Gd <sub>2</sub> (CH <sub>3</sub> CO <sub>2</sub> ) <sub>2</sub> (fum) <sub>2</sub> (H <sub>2</sub> O) <sub>4</sub> ] <sub>∞</sub> | 105.9       | 3.866                              | -                     | 2D/dinuclear | -0.076                               | 8         |
| [Gd(Bz) <sub>3</sub> (dmf)] <sub>∞</sub> <sup>g</sup>                                                                              | 105.801     | 3.914                              | 2.325/2.578           | 1D alt.      | -0.097                               | 16        |

<sup>#</sup> Compound [Gd<sub>4</sub>(CH<sub>3</sub>CO<sub>2</sub>)<sub>4</sub>(acac)<sub>8</sub>(H<sub>2</sub>O)<sub>4</sub>] is not included because its alternate chain structure involves successive A-type and di( $\mu\text{O}:\kappa^2\text{OO}$ -carboxylato) bridges, while only one interaction constant has been derived.<sup>7</sup> Compound {Gd<sub>4</sub>(bta)<sub>3</sub>(H<sub>2</sub>O)<sub>16</sub>}·12H<sub>2</sub>O<sub>∞</sub> is not included either, although its 3D structure is built on mononuclear and dinuclear Gd(III) units, the latter with A-type bridge.<sup>17</sup> The reported exchange coupling interaction was however apparently derived using a model considering only the dinuclear units, and is therefore probably not reliable. <sup>a</sup> abbreviations: H<sub>2</sub>mal = malonic acid; cit = citrate ion, (C<sub>6</sub>H<sub>5</sub>O<sub>7</sub>)<sup>3-</sup>; Hdbm = dibenzoylmethane; H<sub>2</sub>nic = 2-hydroxynicotinic acid; H<sub>2</sub>ox = oxalic acid; H<sub>2</sub>fum = fumaric acid; HbutOH = 4-hydroxybutanoic acid; Htpac = 3-thiophenacetic acid; Hpac = pentanoic acid; H<sub>2</sub>sal = salicylic acid; hypy = 4-(1H)-pyridone; phen = phenantroline; bipy = 2,2'-bipyridine; HBz = benzoic acid; dmf = N,N'-dimethylformamide; Hacac = 2,4-pentandione or acetylacetone; H<sub>4</sub>bta = 1,2,4,5-benzenetetracarboxylic acid. <sup>b</sup> Exchange constant are those corresponding the Hamiltonian  $\hat{H} = -J\hat{S}_i\hat{S}_j$ . <sup>c</sup> The 1D structure in these compounds is built on alternating A-type ferromagnetic and tetra( $\mu\text{O}:\kappa^1\text{O}:\kappa^1\text{O}'$ -carboxylato) antiferromagnetic bridges, and an interaction constant has been derived for both. The former dominates the magnetic properties, and the data given here correspond only to the A-type bridge. <sup>d</sup> Structure made of dinuclear unit with A-type bridges connected into a 3D network through the malonate ligands. <sup>e</sup> the structure of this compound is made of 1D chains with very similar alternate A-type bridges, except one of these bridges has an additional sulfate bridge. <sup>f</sup> The structure of this compound is not known, but WAXS data confirm its similarity to the reported Er analogue and provide an evaluation of the Gd $\cdots$ Gd separation. <sup>g</sup> The 1D structure in this compound is built on alternating B-type and di( $\mu\text{O}:\kappa^1\text{O}:\kappa^1\text{O}'$ -carboxylato) bridges, but the magnetic properties have been modeled with a dimer model with one sole interaction constant, ascribed to the B-type bridge. <sup>\*</sup> Average values of the structurally different bridges, two very similar in **2** and two quite dissimilar in [Gd(Hnica)(H<sub>2</sub>O)<sub>2</sub>(SO<sub>4</sub>)]. The value given for **2** derives from  $zJ/k_B = 0.052$  cm<sup>-1</sup> (see text) and  $z = 4$ , as an average value.

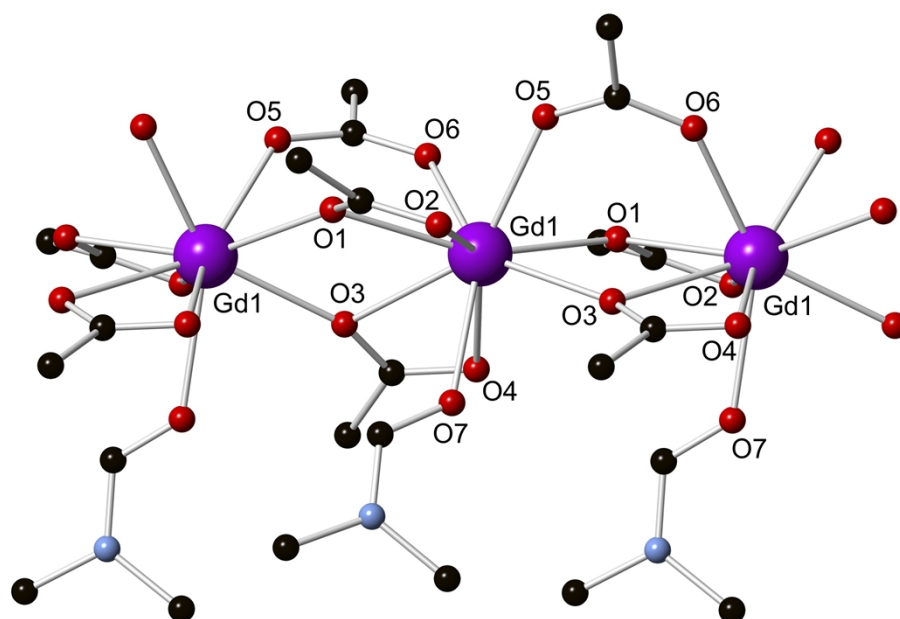

Figure S1. Labeled view of two successive Gd $\cdots$ Gd bridges along the coordination chains in the structure of **1**. The Gd1-O1-O3-Gd1 planes are tilted by 59.8°, but the chain remains close linear with a Gd $\cdots$ Gd $\cdots$ Gd angle of 174.15°.

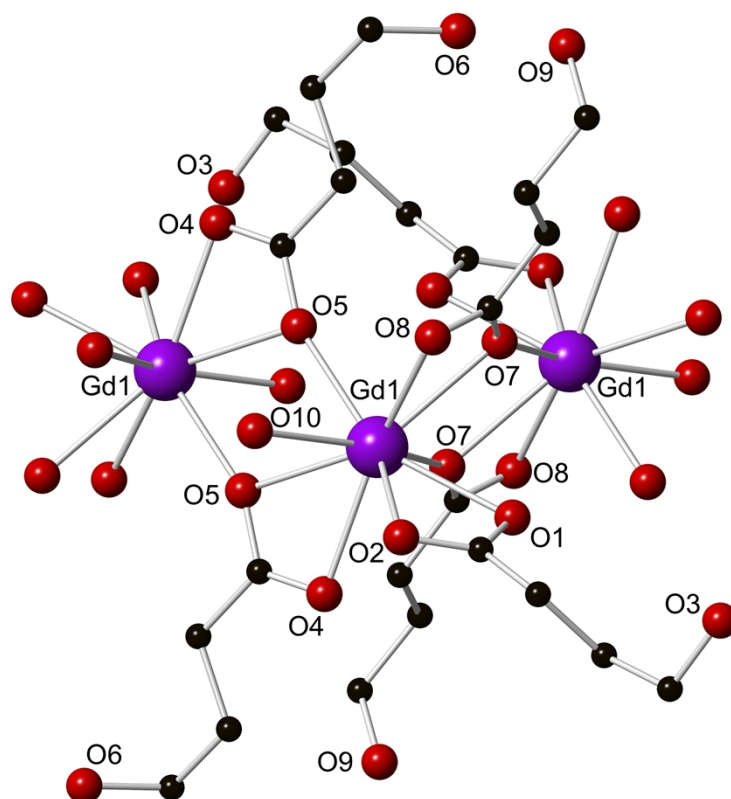

Figure S2. Labeled view of the two successive slightly different Gd $\cdots$ Gd bridges along the coordination chains in the structure of **2**. The Gd1-O5-O5-Gd1 and Gd1-O7-O7-Gd1 planes 87.4°, resulting in a zig-zag chain with a Gd $\cdots$ Gd $\cdots$ Gd angle of 98.23°.

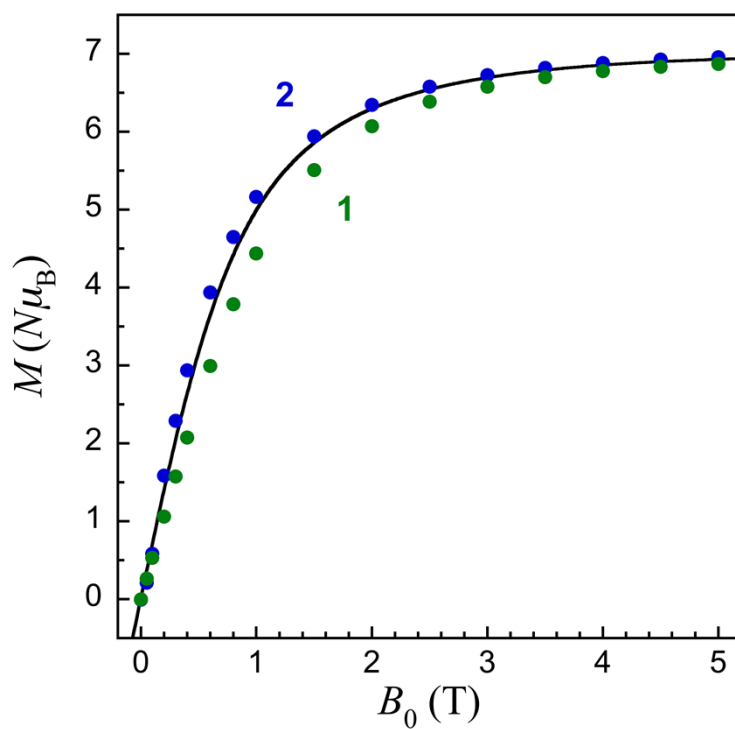

Figure S3. Field dependence of isothermal magnetization for **1** (green dots) and **2** (blue dots) at 2 K. The full line is the Brillouin function for  $S = 7/2$  and  $g = 2$ .

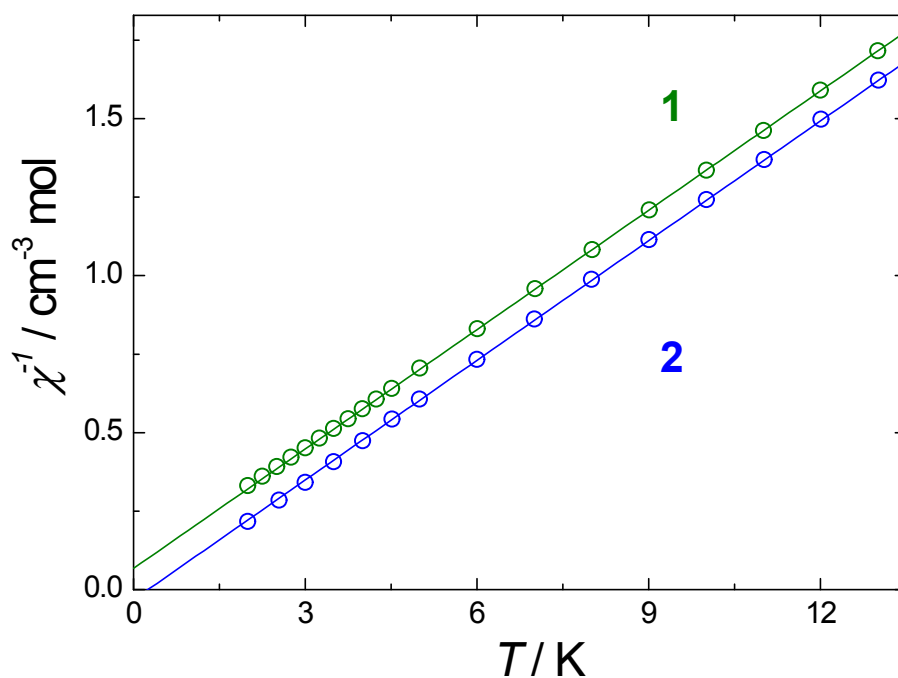

Figure S4. Inverse of magnetic susceptibility  $\chi^{-1}$  vs  $T$  for **1** and **2**. Solid lines are best fits of Curie-Weiss law.

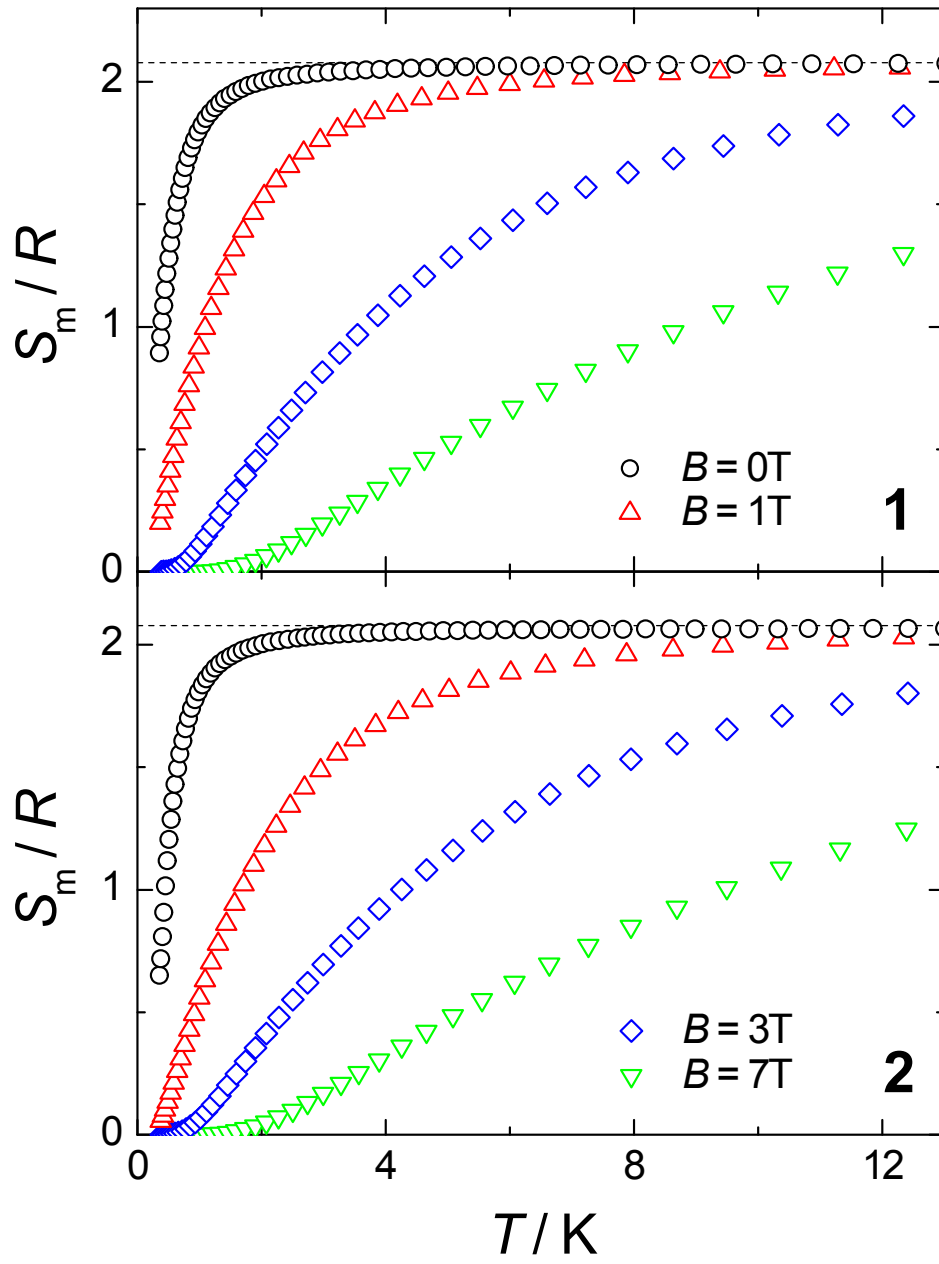

Figure S5. Temperature dependence of the experimental entropy normalized per Gd(III) ion and  $R$ , for **1** (top panel) and **2** (bottom panel). We cope with the lack of specific heat data at the lowest temperatures and  $B = 0$  and  $1\text{ T}$  (see Fig. 4) by scaling  $S_m / R$  to the high-temperature limit  $\ln(s_{\text{Gd}} + 1)$ , as dashed lines.

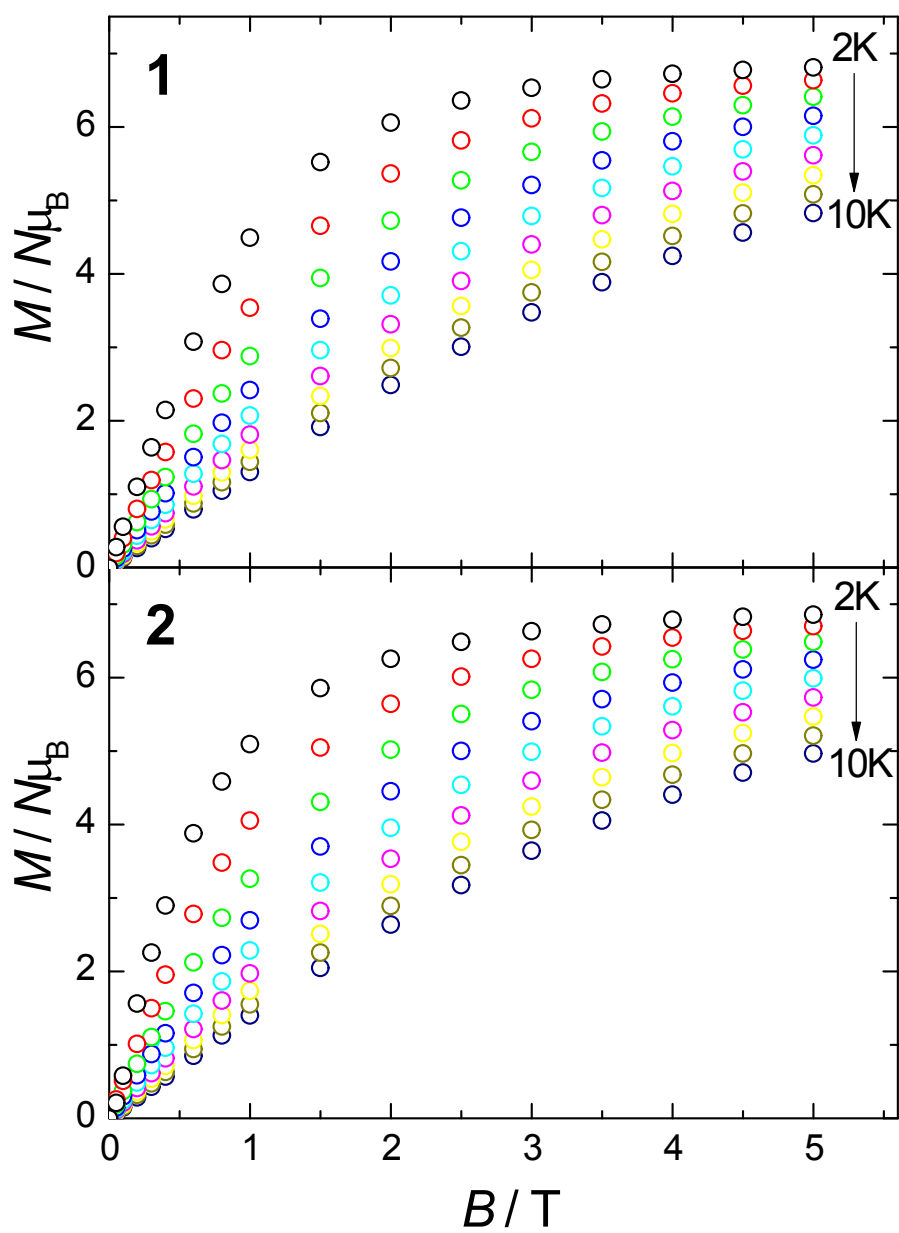

Figure S6. Field dependence of isothermal magnetization for **1** (top) and **2** (bottom) in the temperature range 2 – 10 K.

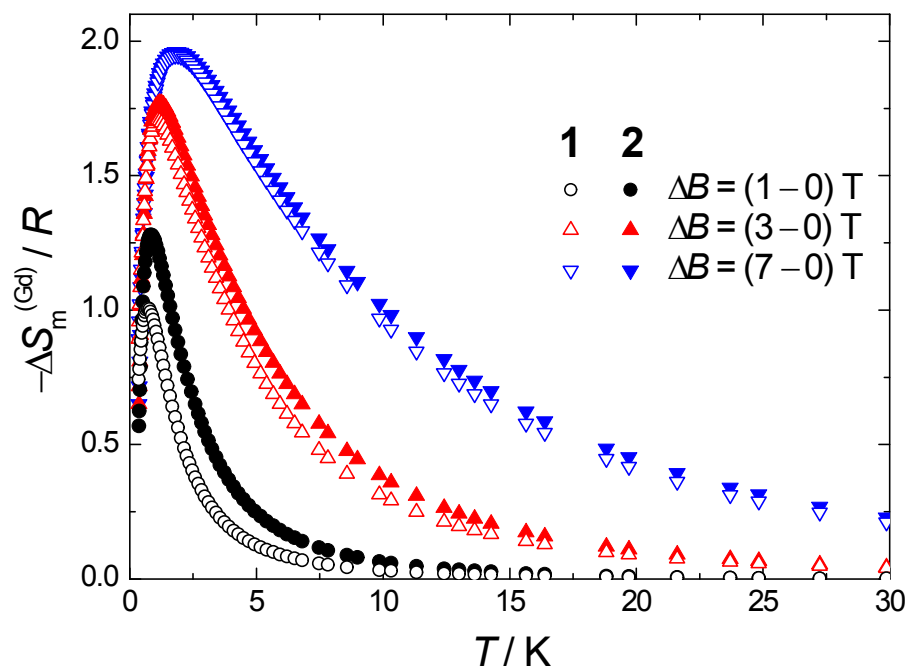

Figure S7. Temperature-dependencies of the magnetic entropy change,  $\Delta S_m$ , normalized to Gd(III) ions and gas constant  $R$ , for the indicated applied-field changes  $\Delta B$ , as obtained from specific heat data for **1** (filled markers) and **2** (empty markers).



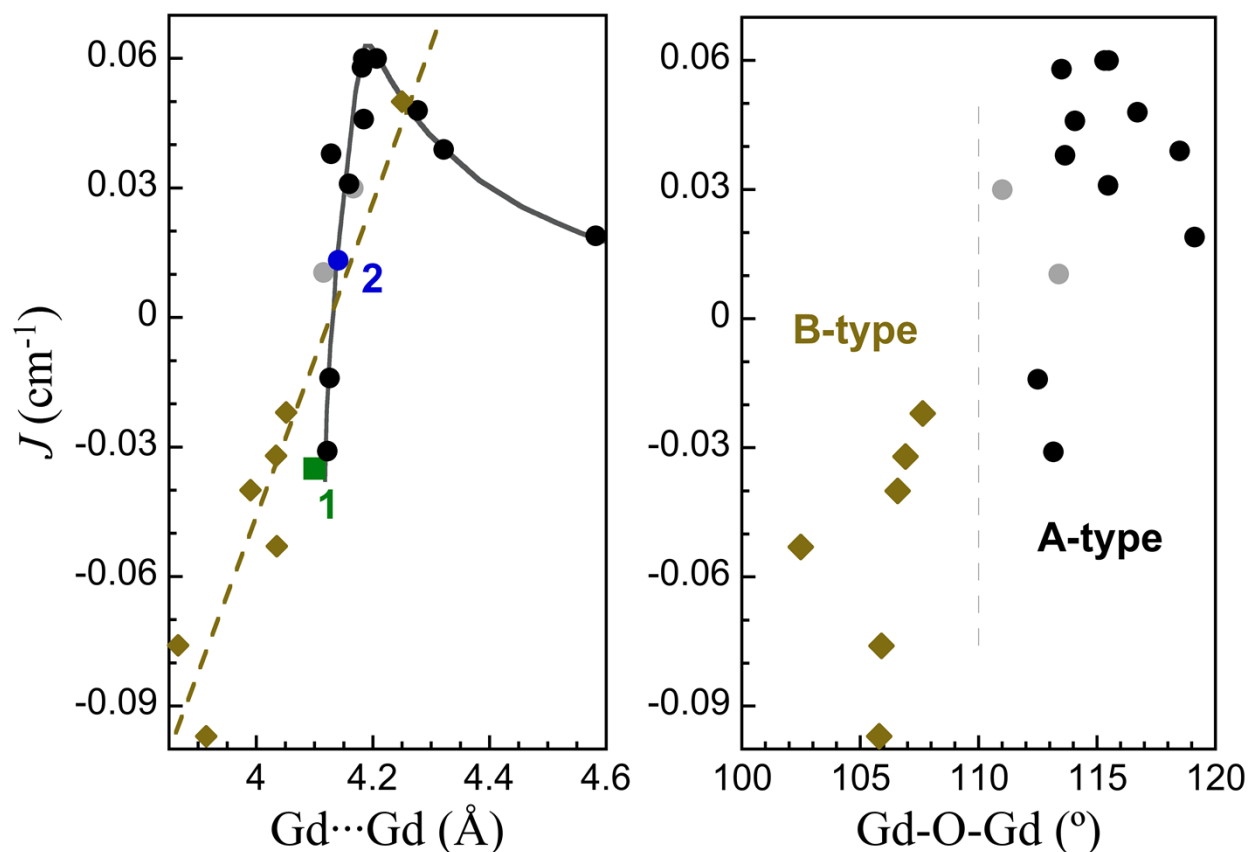

Figure S8. Correlation of the exchange coupling in Gd(III) pairs bridged by either two  $\mu\text{O}:\kappa^2\text{OO}$  carboxylates (A-type, black dots) or two  $\mu\text{O}:\kappa^2\text{OO}$  and two  $\mu\text{OO}$  *syn-syn* carboxylates (B-type, brown rhombs), respectively vs. the Gd···Gd separation (left) and the Gd–O–Gd angle (right). Grey dots are compounds with two different di( $\mu\text{O}:\kappa^2\text{OO}$  carboxylate) bridges for which average values of the Gd···Gd separation and Gd–O–Gd angle have been used. The full line is a guide for the eye highlighting the reasonable correlation of data for A-type bridges. The brown dashed line is a linear fit of the data for B-type bridges. The value given for **2** derives from  $zJ/k_B = 0.052 \text{ cm}^{-1}$  (see text) and  $z = 4$ , as an average value.

## References.

- 1 a) S. T. Hatscher, W. Urland, *Angew. Chem. Int. Ed.* **2003**, 42, 2862-2864; b) M. C. Favas, D. L. Kepert, B. W. Skelton, A. H. White, *J. Chem. Soc. Dalton* **1980**, 454-458
- 2 M. Evangelisti, O. Roubeau, E. Palacios, A. Camón, T. N. Hooper, E. K. Brechin, J. J. Alonso, *Angew. Chem. Int. Ed.* **2011**, 50, 6606-6609
- 3 A. Rohde, W. Urland, *J. Alloys Compd.* **2006**, 408-412, 618-621
- 4 M. Hernández-Molina, C. Ruiz-Pérez, T. López, F. Lloret, M. Julve, *Inorg. Chem.* **2003**, 42, 5456-5458
- 5 A. Rohde, W. Urland, *Z. Anorg. Allg. Chem.* **2005**, 631, 417-420
- 6 R. Baggio, R. Calvo, M. T. Garland, O. Peña, M. Perec, A. Rizzi, *Inorg. Chem.* **2005**, 44, 8979-8987
- 7 F-S. Guo, J-D. Leng, J-L. Liu, Z-S. Meng, M-L. Tong, *Inorg. Chem.* **2012**, 51, 405-413
- 8 L. Cañadillas-Delgado, O. Fabelo, J. Cano, J. Pasán, F. S. Delgado, F. Lloret, M. Julve, C. Ruiz-Pérez, *CrystEngComm* **2009**, 11, 2131-2142
- 9 N. Xu, W. Shi, D-Z. Liao, S-P. Yan, P. Cheng, *Inorg. Chem.* **2008**, 47, 8748-8756
- 10 L. Cañadillas-Delgado, O. Fabelo, J. Pasán, F. S. Delgado, F. Lloret, M. Julve, C. Ruiz-Pérez, *Dalton Trans.* **2010**, 39, 7286-7293
- 11 J-P. Costes, J. M. Clemente-Juan, F. Dahan, F. Nicodème, M. Verelst, *Angew. Chem. Int. Ed.* **2002**, 41, 323-325
- 12 D. John, W. Urland, *Eur. J. Inorg. Chem.* **2006**, 3503-3509
- 13 D. John, W. Urland, *Z. Anorg. Allg. Chem.* **2005**, 631, 2635-2637
- 14 D. John, W. Urland, *Eur. J. Inorg. Chem.* **2005**, 4486-4489
- 15 A. Panagiotopoulos, T. F. Zafiropoulos, S. P. Perlepes, E. Bakalbassis, I. Masson-Ramade, O. Kahn, A. Terzis, C. P. Raptopoulou, *Inorg. Chem.* **1995**, 34, 4918-4920
- 16 A. W-H. Lam, W-T. Wong, S. Gao, G. Wen, X-X. Zhang, *Eur. J. Inorg. Chem.* **2003**, 149-163
- 17 L. Cañadillas-Delgado, J. Pasán, O. Fabelo, M. Julve, F. Lloret, C. Ruiz-Perez, *Polyhedron* **2013**, 52, 321-332
